# Supplementary material for: Non-coding variability at the APOE locus contributes to the Alzheimer’s risk
Source: PubMed Central journal article supplement (PMC6658518; doi:10.1038/s41467-019-10945-z), 2019-07-25
Supplement: 41467_2019_10945_MOESM4_ESM.pdf [file 41467_2019_10945_MOESM4_ESM.pdf]

## **Source data**

- 1. Raw gel image for Supplementary Figure 14a: EMSA**
- 2. Raw gel images for Supplementary Figure 14b: western blots for nuclear proteins**

1. Raw gel image for Supplementary Figure 14a: EMSA

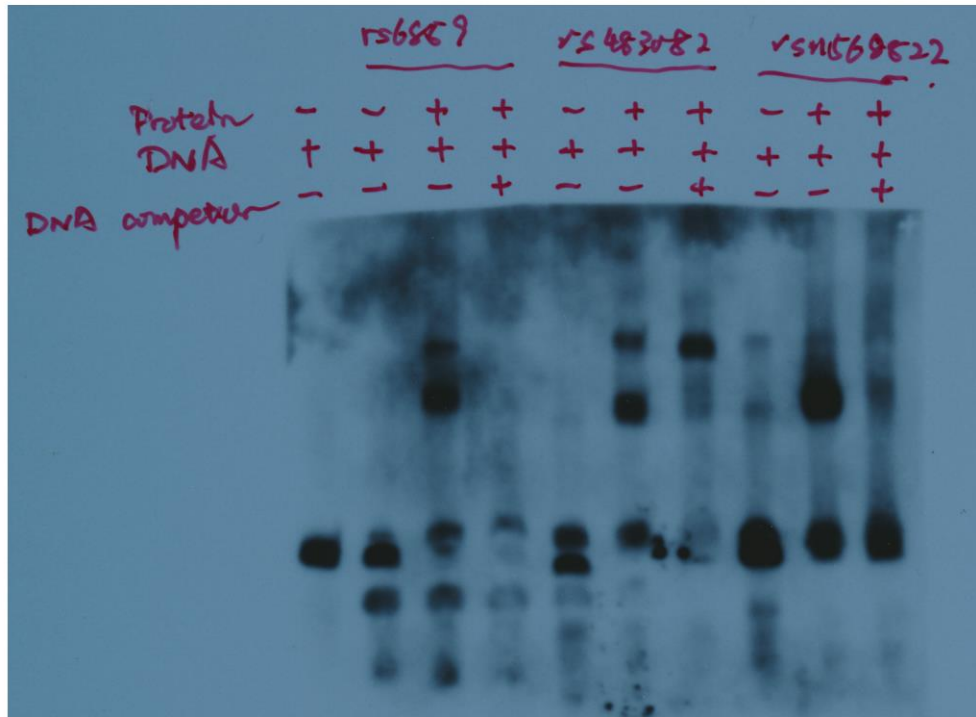

**Associated kits:**

LightShift Chemiluminescent EMSA Kit (Thermo Scientific, 20148);

Chemiluminescent Nucleic Acid Detection Module Kit (Thermo Scientific, 89880)

2. **Raw gel images for Supplementary Figure 14b: western blots for nuclear proteins.**  
 Western blots of HDAC1 and HDAC3 (upper panel) and GAPDH (lower panel) in HEK293T nuclear and cytoplasmic fractions.

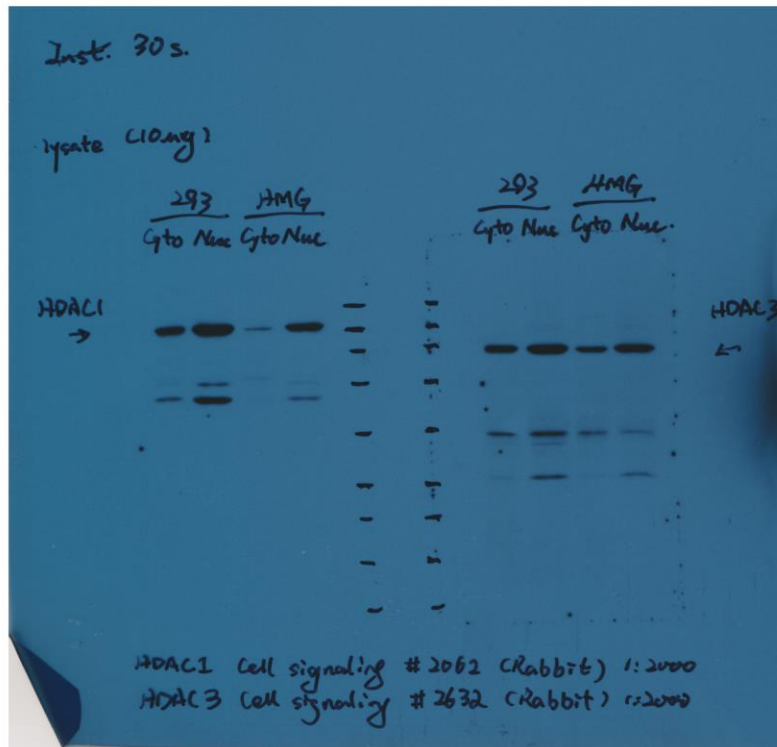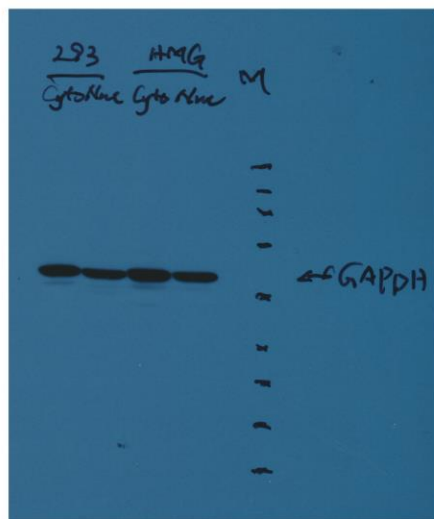

**Associated kits and antibodies:**

NE-PER Nuclear and Cytoplasmic Extraction Reagents (Thermo Scientific, 78833).  
 Cell Signaling Technology (HDAC1: #2062 and HDAC3: #2632);  
 Thermo Scientific (GAPDH: AM4300).
